# Supplementary material
Source: PubMed Central journal article supplement (PMC5759788)
Supplement: NIHMS925574-supplement.pdf [file NIHMS925574-supplement.pdf]

**SUPPLEMENTARY TABLES**  
**INSULT LEVELS/PRESSURE TRANSDUCER READOUT (Well PSI)**  
 (Each Table Represents Different Neuron Culture Experiments Done on Different Days)

**Table 1:** Insult Details for Figure 3 Experiments.

|                      | N=1     | N=2     | N=3     |
|----------------------|---------|---------|---------|
| ~38% Biaxial Stretch | 2.6 PSI | 2.5 PSI | 2.8 PSI |
| ~54% Biaxial Stretch | 4.1 PSI | 4.1 PSI | 4.0 PSI |

**Table 2:** Insult Details for Figures 4-6 Experiments.

|                                    | N=1 (GFAP) |         | N=2 (GFAP) |         | N=1 (NFL) |         | N=2 (NFL) |         | N=1 (Tau) |         | N=2 (Tau) |         |
|------------------------------------|------------|---------|------------|---------|-----------|---------|-----------|---------|-----------|---------|-----------|---------|
| ~54 Biaxial Strain (Single Insult) | 4.3 PSI    |         | 4.3 PSI    |         | 4.1 PSI   |         | 4.1 PSI   |         | 4.1 PSI   |         | 4.2 PSI   |         |
| ~54 Biaxial Strain (Dual Insult)   | T0         | T1h     | T0         | T1h     | T0        | T1h     | T0        | T1h     | T0        | T1h     | T0        | T1h     |
|                                    | 4.2 PSI    | 3.8 PSI | 4.2 PSI    | 4.2 PSI | 4.1 PSI   | 4.1 PSI | 4.1 PSI   | 4.0 PSI | 3.9 PSI   | 4.2 PSI | 4.1 PSI   | 4.1 PSI |

**Yellow = Post-fix Permeabilization with Triton-X100**      *T0=time zero (first injury); T1h=time after first injury (second injury)*

**Table 3:** Insult Details for Figure 7 Experiments.

|                                    | N=1     |         | N=2     |         | N=3     |         |
|------------------------------------|---------|---------|---------|---------|---------|---------|
| ~54 Biaxial Strain (Single Insult) | 4.1 PSI |         | 4.1 PSI |         | 4.1 PSI |         |
| ~54 Biaxial Strain (Dual Insult)   | T0      | T1h     | T0      | T1h     | T0      | T1h     |
| 1h Between Injuries                | 4.2 PSI | 4.1 PSI | 4.2 PSI | 4.2 PSI | 4.1 PSI | 4.1 PSI |
| ~54 Biaxial Strain (Dual Insult)   | T0      | T4h     | T0      | T4h     | T0      | T4h     |
| 4h Between Injuries                | 4.1 PSI | 4.2 PSI | 4.2 PSI | 4.1 PSI | 4.1 PSI | 4.1 PSI |
| ~54 Biaxial Strain (Dual Insult)   | T0      | T8h     | T0      | T8h     | T0      | T8h     |
| 8h Between Injuries                | 4.1 PSI | 4.1 PSI | 4.1 PSI | 4.2 PSI | 4.0 PSI | 4.1 PSI |

**Table 4:** Insult Details for Figure 8 Experiments (Neurobasal/B27 vs. BrainPhys/SM1).

|                                  | N=1     | N=2     | N=3     | N=4     |
|----------------------------------|---------|---------|---------|---------|
| ~54% Biaxial Strain (Neurobasal) | 4.4 PSI | 4.2 PSI | 4.2 PSI | 4.1 PSI |
| ~54% Biaxial Strain (BrainPhys)  | 4.3 PSI | 4.3 PSI | 4.2 PSI | 4.1 PSI |

**Table 5:** Insult Details for Figure 9 Experiments (30MOI).

|                                               | N=1     | N=2     | N=3     | N=4     |
|-----------------------------------------------|---------|---------|---------|---------|
| ~54% Biaxial Strain (30 MOI – Control vector) | 4.1 PSI | 4.2 PSI | 4.2 PSI | 4.1 PSI |
| ~54% Biaxial Strain (30 MOI – RBM5 Vector)    | 4.2 PSI | 4.2 PSI | 4.1 PSI | 4.1 PSI |

**(Tables Continued)**

**Table 6:** Insult Details for Figure 9 Experiments (60 MOI).

|                                                              | <b>N=1</b> | <b>N=2</b> | <b>N=3</b> | <b>N=4</b> |
|--------------------------------------------------------------|------------|------------|------------|------------|
| <b>~54% Biaxial Strain<br/>(60 MOI – Control<br/>vector)</b> | 4.1 PSI    | 4.0 PSI    | 4.1 PSI    | 4.1 PSI    |
| <b>~54% Biaxial Strain<br/>(60 MOI – RBM5<br/>Vector)</b>    | 4.0 PSI    | 3.9 PSI    | 4.0 PSI    | 4.1 PSI    |

Supplementary Fig. 1

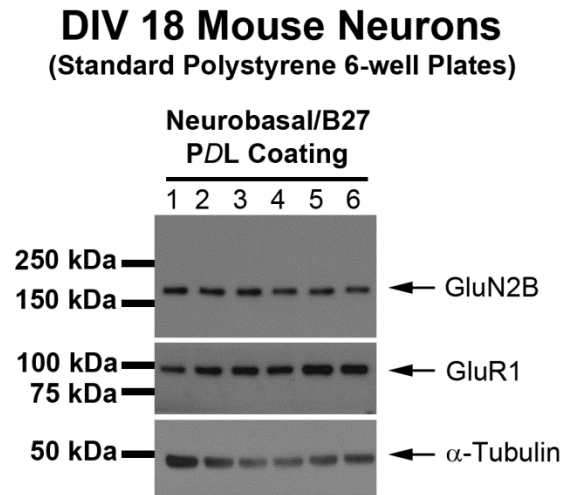

**Supplementary Fig. 1: Detection of GluN2B and GluR1 in aged DIV18 Primary Cortical Neurons Maintained in Neurobasal®/B27.** Primary mouse neurons were grown on a standard polystyrene 6-well plate. Cells were given ½ media exchange every 3d. Cells were washed with PBS and harvested in RIPA buffer (+Phosphatase inhibitors+Protease Inhibitors +EDTA). Homogenates were analyzed by Western blot for GluN2B and GluR1; Cell Signaling Technology (Danvers, MA, USA): Rabbit Monoclonal Anti-NMDAR2B (Cat# 4212) and Rabbit Monoclonal Anti-GluR1 (Cat# 13185).

Supplementary Fig. 2

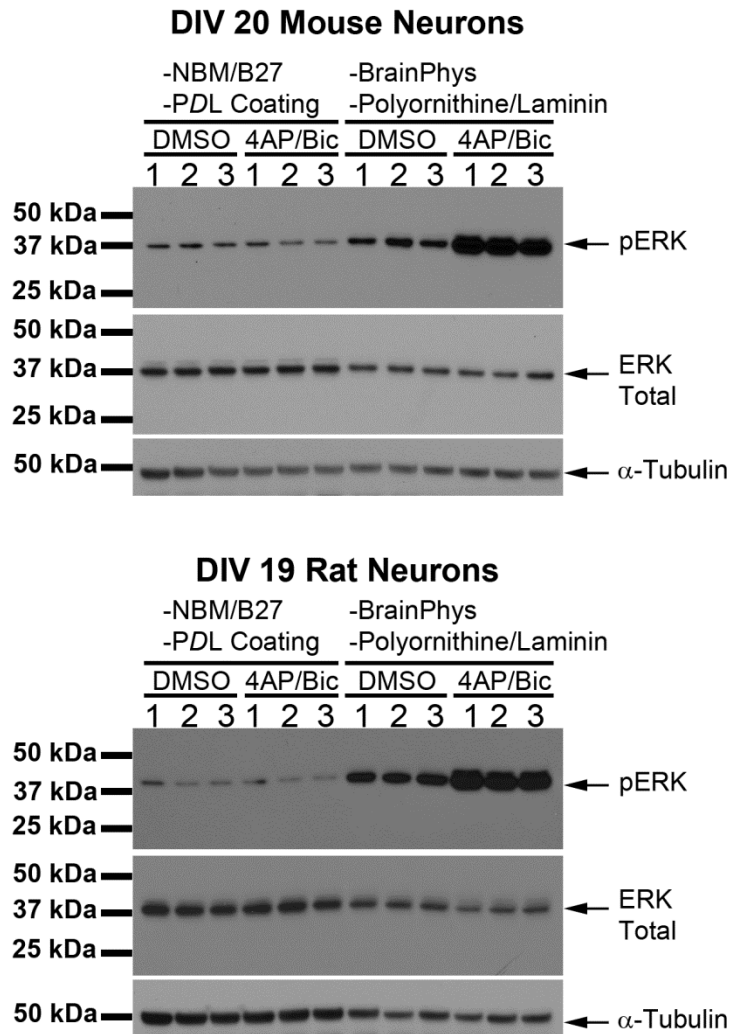

**Supplementary Fig. 2: BrainPhys®/SM1 Increases Synaptic Response (Activation) to Treatment with 4AP/Bicuculline in Aged CNS Cultures.** Mouse and rat primary cortical neurons were prepared as described in methods. Cells maintained in Neurobasal®/B27 were grown on PDL coated plates. Cells maintained in BrainPhys®/SM1 were grown on Laminin/Poly-L-ornithine coated plates (as recommended by the vendor STEMCELL Technologies Inc.). On the final day of experimentation, cells were treated 15min with vehicle (water/DMSO) or 1mM 4-AP/25 $\mu$ M bicuculline (i.e. a potassium channel blocker and GABA<sub>A</sub> antagonist). Cells were then immediately washed with ice cold PBS and harvested in RIPA buffer (+Phosphatase inhibitors+Protease Inhibitors +EDTA). Homogenates were analyzed by Western blot for pERK and ERK total levels. Synaptic activation induced by 4-AP/Bic treatment is well established to increase pERK levels in cultured neurons, and is associated with stimulation of synaptic-localized NMDARs.
